# Supplementary material for: Implications of maraviroc and/or rapamycin in a mouse model of fragility
Source: publisher site journal article supplement (doi:10.18632/aging.103167), 2020-04-30
Supplement: Supplementary file [file aging-v12i9-103167-supplementary-material-SD1.pdf]

## SUPPLEMENTARY TABLES

**Supplementary Table 1. List of primers used by SybrGreen for real-time PCR.**

| Name                                        | Gene symbol   | Primers Sequence                                                                          |
|---------------------------------------------|---------------|-------------------------------------------------------------------------------------------|
| Glyceraldehyde 3-phosphate dehydrogenase    | GAPDH         | Sense: 5'-CATGTTCCA GTATGACTCCA CTC-3'<br>Antisense: 5'-GGCCTCA CCCCATTTGATGT-3'          |
| Interleukin-6                               | IL-6          | Sense: 5'-ATGGATGCTA CCAAAGTGGAT-3'<br>Antisense: 5'-TGAAGGACTCTGGCTTTGTCT-3'             |
| Interleukin-1 beta                          | IL-1 $\beta$  | Sense: 5'-CTGA ACTCAACTGTGAAATGCCA-3'<br>Antisense: 5'-AAAAGTTTGGAAAGCA GCCCT-3'          |
| Tumor necrosis factor- $\alpha$             | TNF- $\alpha$ | Sense 5'- ACGGCATGGA TCTCAAAGAC-3'<br>Antisense 5'- AGATAGCAAATCGGCT GACG-3'              |
| Interleukin-18                              | IL-18         | Sense: 5'- GACTCTTGCGTCAACTTCAA GG -3'<br>Antisense: 5'- CAGGCTGTCTTTGTCAA CGA -3'        |
| Chemokine receptor type 5                   | CCR5          | Sense: 5'-CGAAAACACATGGTCAAACG-3'<br>Antisense: 5'-TTCCTACTCCAAAGCTGCAT-3'                |
| Chemokine ligand 5 (RANTES)                 | CCL5          | Sense: 5'-ATATGGCTCGGACA CCACTC-3'<br>Antisense: 5'-GTGACAAAACAGCA CTGCAA GA -3'          |
| Mammalian target of Rapamycin               | mTOR          | Sense: 5'- CTGGGACTCAAATCTCTCCAGTTC-3'<br>Antisense: 5'- GAACAATAGGGTGAATGATCCGGG-3'      |
| Caspase-3                                   | Caspase-3     | Sense: 5'-ATGGGA GCAA GTCA GTGGAC-3'<br>Antisense: 5'-CGTACCA GA GCGA GATGACA-3'          |
| Insuline receptor substrate-1               | IRS-1         | Sense: 5'- CCAGCCTGGCTATTTA GCTG-3'<br>Antisense: 5'-CCCAACTCAACTCCA CCACT-3'             |
| Insuline receptor substrate-2               | IRS-2         | Sense: 5'-GTAGTTCA GGTGCGCTCTGC-3'<br>Antisense: 5'-CAGCTATTGGGACCA CCACT-3'              |
| NAD-dependent protein deacetylase sirtuin-1 | SIRT-1        | Sense: 5'- AGTTCAGCCGTCTCTGTGT-3'<br>Antisense: 5'- CTCCACGAACA GCTTCA CAA-3'             |
| NAD-dependent protein deacetylase sirtuin-3 | SIRT-3        | Sense: 5' GCTGCTTCTGCGGCTCTATAC-3'<br>Antisense: 5'-GAAGGACCTTCGACA GA CCGT-3'            |
| NAD-dependent protein deacetylase sirtuin-6 | SIRT-6        | Sense: 5'- CTGAGAGA CACCATTCTGGACT-3'<br>Antisense: 5'- GGTTGCA GGTTGA CAATGACC-3'        |
| Nuclear factor NF-kappa-B p105 subunit      | NFkB1         | Sense: 5'-GAAATTCCTGATCCA GA CAAAAAC-3'<br>Antisense: 5'-ATCACTTCAATGGCCTCTGTGTAG-3'      |
| Nuclear factor NF-kappa-B p100 subunit      | NFkB2         | Sense: 5'-CTGGT GGA CA CATA CA GGAA GA C-3'<br>Antisense: 5'-ATAGGCACTGTCTTCTTTCA CCTC-3' |

**Supplementary Table 2. Details of the ELISA assay methods.**

| <b>Biomarker</b> | <b>Procedure</b>  | <b>Sensitivity Minimum Detectable Dose (MDD)</b> | <b>Commercial Producer</b> |
|------------------|-------------------|--------------------------------------------------|----------------------------|
| IL-1 $\beta$     | Quantikine® ELISA | 0.46-4.80 pg/ml<br>(The mean was 2.31 pg/ml)     | R&D Systems                |
| IL-6             | Quantikine® ELISA | 1.3-1.8 pg/ml<br>(The mean was 1.6 pg/ml)        | R&D Systems                |
| TNF- $\alpha$    | Quantikine® ELISA | 0.36-7.21 pg/ml<br>(The mean was 1.88 pg/ml)     | R&D Systems                |
| Myostatin        | Quantikine® ELISA | 0.922-5.32 pg/ml<br>(The mean was 2.25 pg/ml)    | R&D Systems                |

**Abbreviations:** 1 IL-1 $\beta$  = interleukin 1 $\beta$ ; IL6 = interleukin 6; TNF- $\alpha$  = Tumor necrosis factor alpha.

**Supplementary Table 3. Kinases detected in this study.**

| <b>Antibody used</b>                   | <b>Commercial Producer</b>                                 | <b>Molecular weight of the protein</b> |
|----------------------------------------|------------------------------------------------------------|----------------------------------------|
| anti-AMPK antibody                     | Abcam, Cambridge, MA, USA<br>(Cat. No. 80039)              | 62 kDa                                 |
| Anti-AMPK (phospho Thr 172) antibody   | Cell Signaling, Danvers, MA<br>(Cat. No. 109458)           | 60 kDa                                 |
| Anti-AKT antibody                      | Cell Signaling, Danvers, MA<br>(Cat. No. 9272)             | 60 kDa                                 |
| Anti- AKT (phospho S473) antibody      | Abcam, Cambridge, MA, USA<br>(Cat No. 81283)               | 56 kDa                                 |
| Anti-NF-kb p65 antibody                | Abcam, Cambridge, MA, USA<br>(Cat No. 16502)               | 64 kDa                                 |
| Anti NF-kb p65 (phospho S529) antibody | Abcam, Cambridge, MA, USA<br>(Cat No. 16502)               | 60 kDa                                 |
| mTOR                                   | Cell Signaling, Danvers, MA<br>(Cat. No. 2983T)            | 289 kDa                                |
| Anti-mTOR (phospho S2448) antibody     | Abcam, Cambridge, MA, USA<br>(Cat No. 109268)              | kDa                                    |
| Anti-SIRT1 antibody                    | Abcam, Cambridge, MA, USA<br>(Cat No. 32441)               | 110 kDa                                |
| Anti-SIRT3 antibody                    | Abcam, Cambridge, MA, USA<br>(Cat No. 217319)              | 28 kDa                                 |
| Anti-SIRT6 antibody                    | Abcam, Cambridge, MA, USA<br>(Cat No. 191385)              | 39 kDa                                 |
| Anti-IRS1 antibody                     | Abcam, Cambridge, MA, USA<br>(Cat No. 40777)               | 170 kDa                                |
| Anti-IRS2 antibody                     | Abcam, Cambridge, MA, USA<br>(Cat No. 134101)              | 137 kDa                                |
| Anti-pro Caspase-3 antibody            | Abcam, Cambridge, MA, USA<br>(Cat No. 32150)               | 35 kDa                                 |
| Anti-GAPDH antibody                    | Thermo Fisher Scientific, Waltham, MA<br>(Cat. No. AM4300) | 37 kDa                                 |
